# Supplementary material for: miR-200b downregulates CFTR during hypoxia in human lung epithelial cells
Source: PubMed Central journal article supplement (PMC5688675; doi:10.1186/s11658-017-0054-0), 2017-11-15

**A**

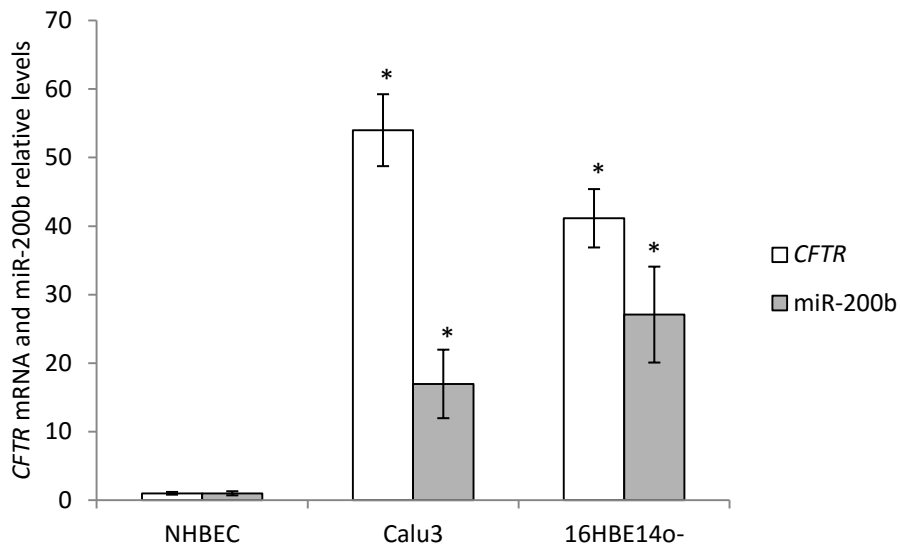

**B**

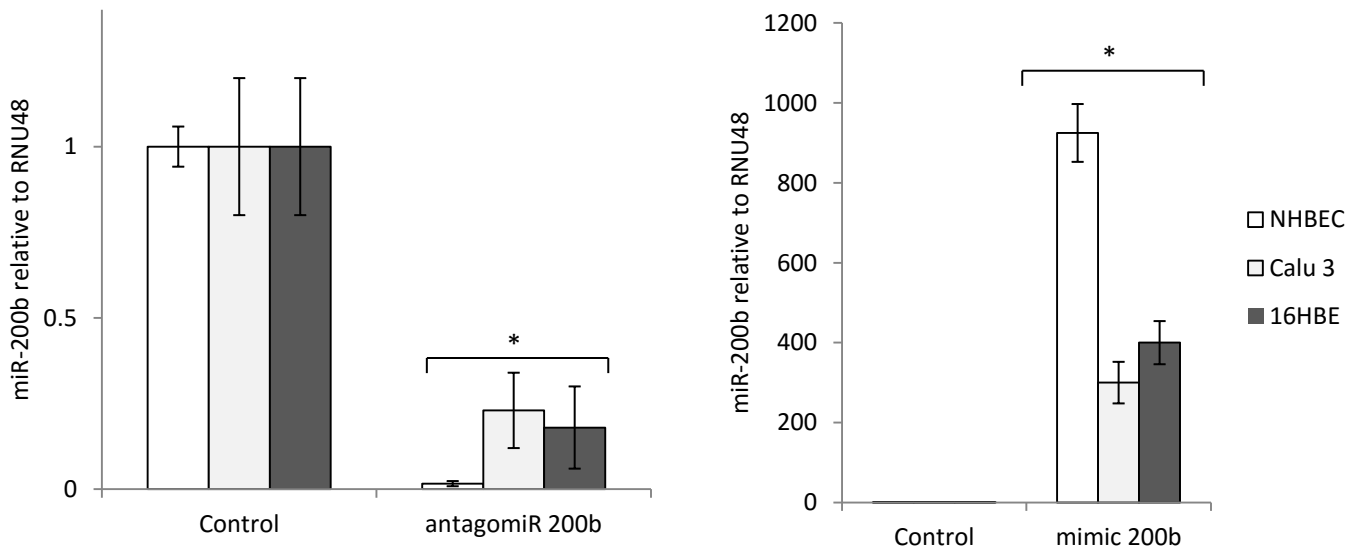

Supplement: 11658_2017_54_MOESM1_ESM.pdf [file 11658_2017_54_MOESM1_ESM.pdf]
